# Supplementary material
Source: publisher figshare collection journal article supplement (https://sage.figshare.com/ndownloader/files/12404576)
Supplement: Supplementary file 1 [file 12404576]

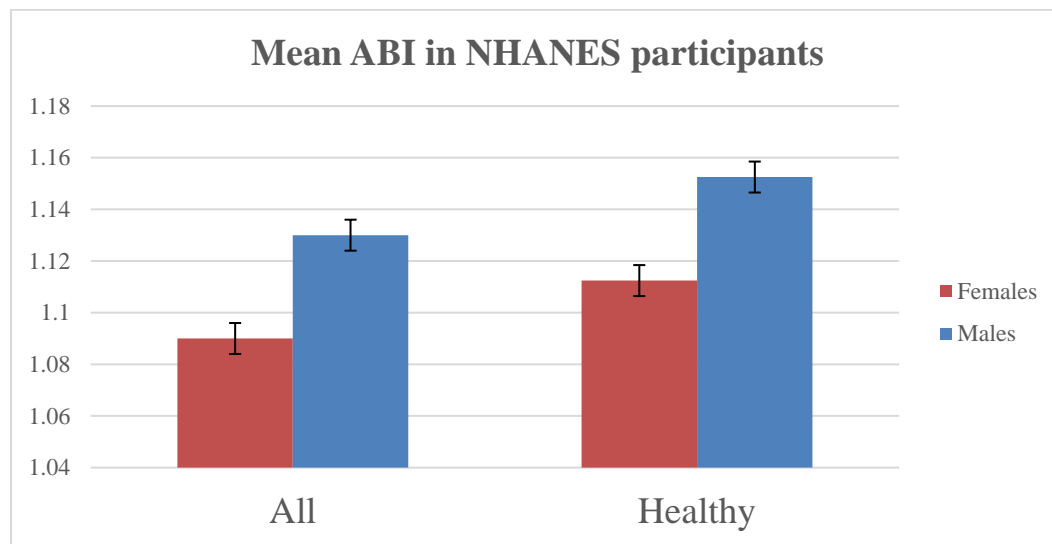

**Supplemental Figure 1:** Mean ABI of all female and male participants ( $1.08 \pm 0.004$  vs.  $1.12 \pm 0.004$  respectively,  $p < 0.0001$ ) and healthy females compared to males ( $1.11 \pm 0.006$  vs.  $1.15 \pm 0.006$ ,  $p < 0.0001$ ). Healthy defined as participants with no CVD, diabetes, smoking, hypertension, or high cholesterol. Data shown is raw ABI data.

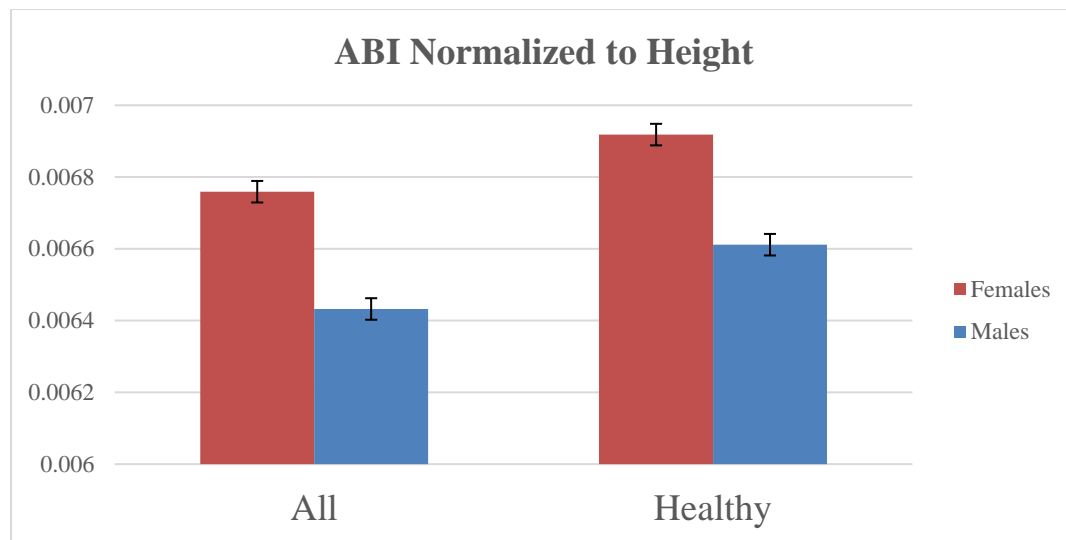

**Supplemental Figure 2:** Mean ABI normalized to height of all female and male participants ( $0.0067 \pm 0.00002$  vs.  $0.0064 \pm 0.00003$  respectively,  $p < 0.0001$ ) and healthy females compared to males ( $0.0069 \pm 0.00004$  vs.  $0.0066 \pm 0.00004$  respectively,  $p < 0.0001$ ). Healthy defined as participants with no CVD, diabetes, smoking, hypertension, or high cholesterol. Data shown is raw ABI data.

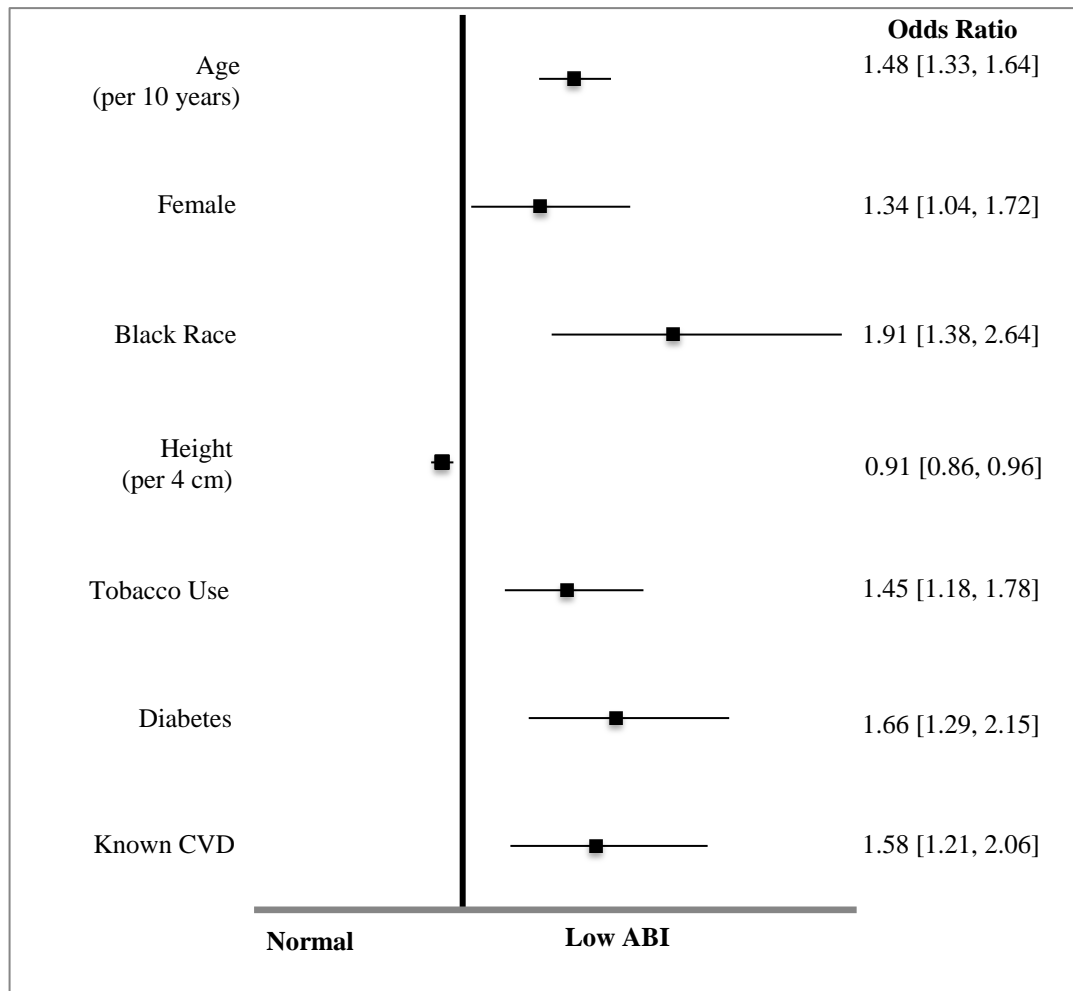

**Supplemental Figure 3:** Odds Ratio for low ABI (95% CI) for all covariates in fully adjusted model.

This model also included body mass index, hypertension, and non-HDL cholesterol (p=NS and not shown). **ABI = ankle-brachial index**; CVD = cardiovascular disease; non-HDL = non-high-density lipoprotein cholesterol; **NS = not significant**.
